# Supplementary material
Source: MDPI journal article supplement (https://www.mdpi.com/2073-4433/13/2/206)
Supplement: s1 [file s1]

# Variability of the Southwestern Patagonia (51°S) Winds in the Recent (1980–2020) Period: Implications for Past Wind Reconstructions

Carolina Gómez-Fontéalba <sup>1,2,3,\*</sup>, Valentina Flores-Aqueveque <sup>1,2,3</sup> and Stéphane Christophe Alfaro <sup>4</sup>

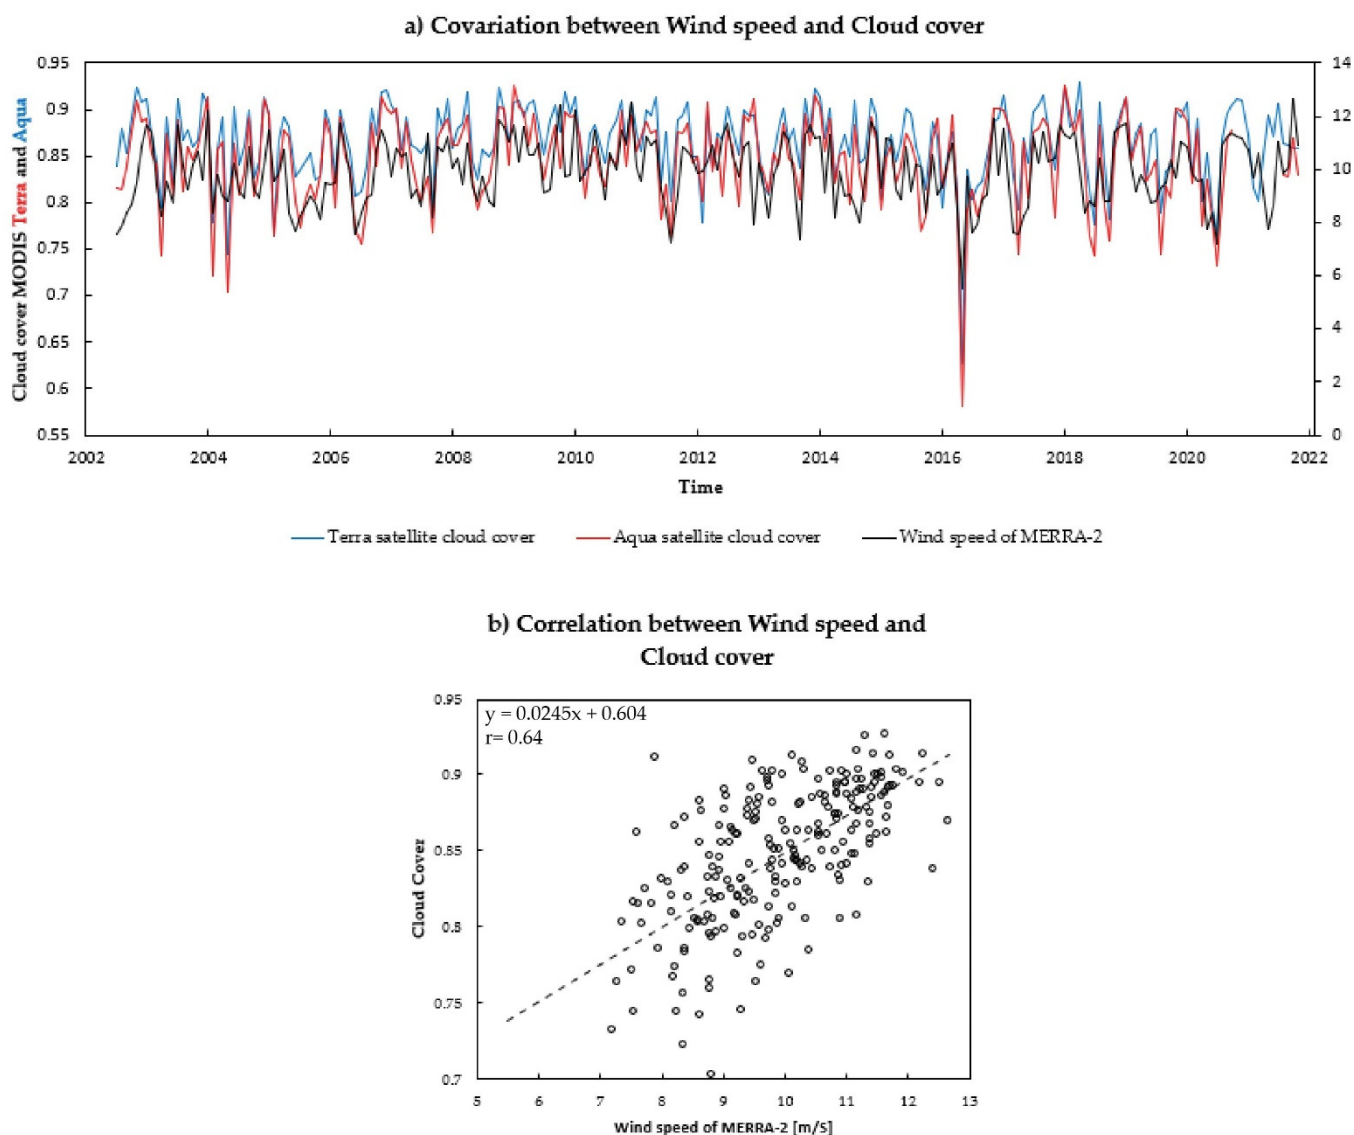

**Figure S1.** a) Covariation of the wind speed of MERRA-2 and the cloud cover of the MODIS satellite. b) Linear correlation of the wind speed of MERRA-2 and the cloud cover of the MODIS satellite
